# Supplementary material for: A Polymorphism in the TMPRSS2 Gene Increases the Risk of Death in Older Patients Hospitalized with COVID-19
Source: MDPI journal article supplement (doi:10.3390/v14112557), 2022-11-18
Supplement: s1 [file s1]

## Supplementary Material

**Figure S1.** Allele discrimination plot of *TMPRSS2* (A) rs12329760 and (B) rs2070788 polymorphisms.

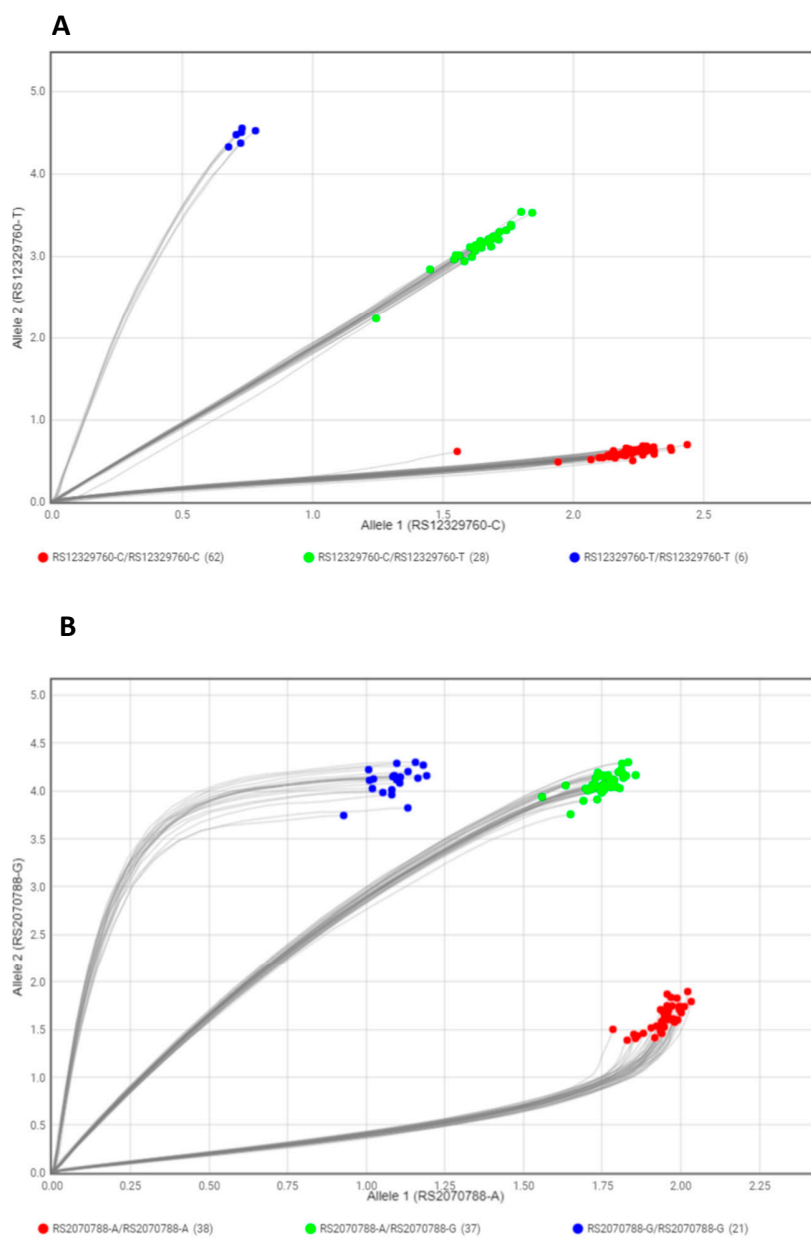

**Table S1.** Frequencies of *TMPRSS2* variants in Brazilian samples and in other reference populations.

| SNP               | Coordinate <sup>a</sup> | A1 | SABE-Brazil <sup>b</sup> | MAF (1000 Genomes Project <sup>c</sup> ) |      |      |      |      |      |
|-------------------|-------------------------|----|--------------------------|------------------------------------------|------|------|------|------|------|
|                   |                         |    |                          | Global                                   | AFR  | EAS  | EUR  | SAS  | AMR  |
| <b>rs2070788</b>  | chr21:41470061          | G  | 0.58                     | 0.39                                     | 0.27 | 0.36 | 0.46 | 0.47 | 0.49 |
| <b>rs12329760</b> | chr21:41480570          | T  | 0.20                     | 0.26                                     | 0.29 | 0.36 | 0.24 | 0.23 | 0.15 |

A1: reference allele; MAF: minor allele frequency; AFR: African/African Americans; EAS: East Asians; EUR: Europeans; SAS: South Asians; AMR: Admixed Americans. <sup>a</sup>Human genome assembly: GRCh38, <sup>b</sup>SABE-Brazil - Naslavsky et al., 2022 [26], <sup>c</sup>1000 Genomes Project (phase 3) - 1000 Genomes Project Consortium et al., 2015 [39].
